# Supplementary material for: Kinetics and pressure-dependent HOx yields of the reaction between the Criegee intermediate CH2OO and HNO3
Source: Royal Society of Chemistry journal article supplement (doi:10.1039/d2cp03660f), 2022-12-19
Supplement: d2cp03660f1.pdf [file d2cp03660f1.pdf]

## Electronic Supplementary Information

### Kinetics and pressure-dependent HO<sub>x</sub> yields of the reaction between Criegee intermediate CH<sub>2</sub>OO and HNO<sub>3</sub>

Pei-Ling Luo\*<sup>a</sup>

<sup>a</sup>Institute of Atomic and Molecular Sciences, Academia Sinica, Taipei 10617, Taiwan.

\*E-mail: plluo@gate.sinica.edu.tw

#### Table of content

**Note S1.** Descriptions of adopted kinetic model and reaction rate coefficients.

**Figure S1.** Comparison of the CH<sub>2</sub>OO time traces recorded using different experimental methods.

**Figure S2.** Rate coefficients for the CH<sub>2</sub>OO + I reaction ( $k_3$ ) as a function of the total pressure.

**Figure S3.** Comparison of plots of  $k^I$  vs. [HNO<sub>3</sub>]<sub>0</sub> derived from model fit and single-exponential fit.

**Figure S4.** Comparison of the measured and simulated temporal profiles of the OH radical.

**Figure S5.** Comparison of the measured and simulated temporal profiles of the HO<sub>2</sub> radical.

**Figure S6.** Comparison of temporal concentration profiles of (a) CH<sub>2</sub>OO, (b) CH<sub>2</sub>O, (c) OH, and (d) HO<sub>2</sub> with and without HNO<sub>3</sub> addition at 57.9 Torr.

**Figure S7.** Inverse of the fractional yield of the OH + CH<sub>2</sub>(O)NO<sub>3</sub> product channel ( $y_{\text{OH}}^{-1}$ ) as a function of pressure.

**Figure S8.** Inverse of the fractional yield of the NO<sub>2</sub> + CH<sub>2</sub>O + HO<sub>2</sub> product channel ( $y_{\text{HO}_2}^{-1}$ ) as a function of pressure.

**Table S1.** The simplified model used for the kinetic study of the reaction CH<sub>2</sub>OO + HNO<sub>3</sub>.

**Table S2.** Summary of experimental conditions and fitted rate coefficients  $k^I$ .

**Table S3.** Summary of experimental and computational results for the  $k_{\text{CH}_2\text{OO}+\text{HNO}_3}$ .

**Table S4.** Global kinetic model and rate coefficients employed for simulation of temporal profiles.

**Table S5.** Summary of experimental conditions, obtained rate coefficients, and branching ratios.

#### References

**Note S1.** Descriptions of adopted kinetic model and reaction rate coefficients.

In kinetic studies, the simplified kinetic model (Table S1) was employed to determine the rate coefficients of the reaction  $\text{CH}_2\text{OO} + \text{HNO}_3$ . The simplified kinetic scheme takes into account key reaction paths including the formation and self-reaction of  $\text{CH}_2\text{OO}$  as well as the  $\text{CH}_2\text{OO} + \text{I}$  reaction.<sup>1-5</sup> To fit the first-order rate coefficient  $k^1$  ( $= k_7 \times [\text{HNO}_3]_0$  in Table S1), all rate coefficients at values listed in Table S1 were fixed and the initial concentrations  $[\text{CH}_2\text{I}]_0$ ,  $[\text{O}_2]_0$ , and  $[\text{HNO}_3]_0$  were given. The root mean square error (RMSE) of each fitted residual was obtained to be  $\sim 3\%$  under wide variations in experimental conditions, indicating the adequacy of the adopted kinetic model.

To determine the branching ratios for the  $\text{OH} + \text{CH}_2(\text{O})\text{NO}_3$  and  $\text{NO}_2 + \text{CH}_2\text{O} + \text{HO}_2$  product channels of the reaction  $\text{CH}_2\text{OO} + \text{HNO}_3$ , the global kinetic model (Table S4) was used to simulate the temporal concentration profiles of  $\text{CH}_2\text{OO}$ ,  $\text{CH}_2\text{O}$ ,  $\text{OH}$ , and  $\text{HO}_2$ . The global kinetic model has been explored by quantitative analysis of the time traces of  $\text{CH}_2\text{OO}$ ,  $\text{CH}_2\text{O}$ ,  $\text{OH}$  and  $\text{HO}_2$  radicals recorded under varied experimental conditions with and without the addition of  $\text{SO}_2$ .<sup>2</sup> The global kinetic scheme takes into account the reaction pathways related to the formation of the  $\text{OH}$  and  $\text{HO}_2$  radicals that could be formed from decomposition of initially energized and vibrationally excited Criegee intermediates. To investigate the reaction  $\text{CH}_2\text{OO} + \text{HNO}_3$ , only the pathways of  $\text{CH}_2\text{OO} + \text{SO}_2$  in the previous work were replaced to the pathways of  $\text{CH}_2\text{OO} + \text{HNO}_3$ . Additionally, to simplify the model, only three product channels of the reaction  $\text{CH}_2\text{OO} + \text{HNO}_3$  were listed in the model:

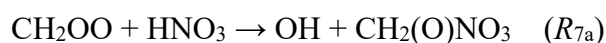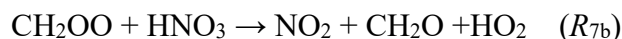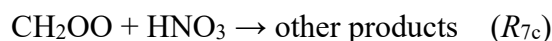

in which the branching ratios for the  $\text{OH} + \text{CH}_2(\text{O})\text{NO}_3$  and  $\text{NO}_2 + \text{CH}_2\text{O} + \text{HO}_2$  product channels are  $y_{\text{OH}}$  and  $y_{\text{HO}_2}$ , respectively, and the branching ratio for other products is  $1 - y_{\text{OH}} - y_{\text{HO}_2}$ . In addition, the rate coefficients of the reaction vibrationally excited  $\text{CH}_2\text{OO}^\# + \text{HNO}_3$  ( $R_{11a-11c}$ ) were set as same as that of the reaction  $\text{CH}_2\text{OO} + \text{HNO}_3$  ( $R_{7a-7c}$ ).

In the reaction system, the  $\text{OH}$  radicals might be reacted away mainly with the precursor  $\text{CH}_2\text{I}_2$  or the product  $\text{I}_2$  and  $\text{NMHP}$ . Due to lack of the accurate rate coefficients of these reactions, the overall decay rate ( $k_{18}$ ) of the  $\text{OH}$  radicals was obtained by fitting the time trace with a single exponential-decay function, as shown in Fig. S4(a). Afterwards, the  $y_{\text{OH}}$  could be obtained by fitting the time traces using the global kinetic model with the fixed overall decay rate ( $k_{18}$ ). Considering an uncertainty of 10% on obtained concentrations of the  $\text{OH}$  radicals, the  $y_{\text{OH}}$  would be varied by  $\sim 20\%$ , as shown in Figs. S4(b).

With the addition of  $\text{HNO}_3$ , the  $\text{HO}_2$  radicals can be quickly generated and followed by a slow decay through the underlying reaction pathways ( $R_{19-21}$ ). Because the overall decay rates ( $10^1 \sim 10^2 \text{ s}^{-1}$ ) are much smaller than the formation rates ( $10^4 \sim 10^5 \text{ s}^{-1}$ ), the  $y_{\text{HO}_2}$  could be determined by simulating the time traces with the kinetic model excluding the loss pathways of  $\text{HO}_2$  ( $R_{19-21}$ ). Considering an uncertainty of 10% on obtained concentrations of the  $\text{HO}_2$  radicals, the  $y_{\text{HO}_2}$  would be varied by  $\sim 10\%$ ,

as shown in Figs. S5(a). Afterwards, the additional loss rate ( $k_{21}$ ) for the HO<sub>2</sub> radicals can be obtained by fitting the measured traces with the global kinetic model and the fixed  $y_{\text{HO}_2}$ , as shown in Fig. S5(b).

In the absence of HNO<sub>3</sub>, about 90% CH<sub>2</sub>OO would be reacted to form CH<sub>2</sub>O via self-reaction of CH<sub>2</sub>OO and the reaction CH<sub>2</sub>OO + I. In the experiments, the formation rates of CH<sub>2</sub>O increase, but the yields of CH<sub>2</sub>O decrease with the addition of HNO<sub>3</sub>, indicating that a part of CH<sub>2</sub>O could be generated from the reaction CH<sub>2</sub>OO + HNO<sub>3</sub>, but the fractional yields of the CH<sub>2</sub>O product channel of the reaction CH<sub>2</sub>OO + HNO<sub>3</sub> might be lower comparing to that of the reactions CH<sub>2</sub>OO + CH<sub>2</sub>OO and CH<sub>2</sub>OO + I. The temporal concentration profile of CH<sub>2</sub>O can be also fitted with kinetic model to derive the branching ratio ( $y_{\text{HO}_2}$ ) for the NO<sub>2</sub> + CH<sub>2</sub>O + HO<sub>2</sub> product channel and the derived  $y_{\text{HO}_2}$  is consistent with the value obtained by analyzing the time trace of HO<sub>2</sub> radicals.

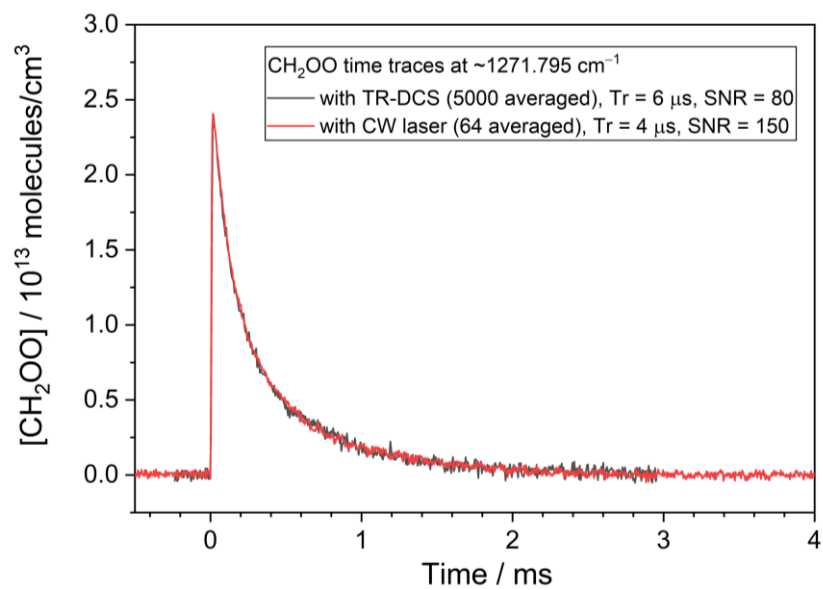

**Figure S1.** Comparison of the CH<sub>2</sub>OO time traces recorded with different methods. The black trace measured by employing time-resolved dual-comb spectroscopy (TR-DCS) and the red trace measured by using the CW laser mode.

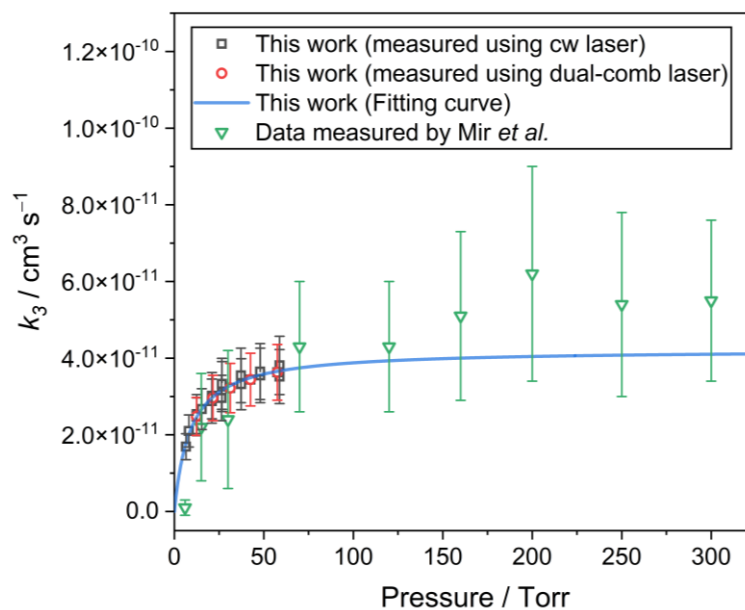

**Figure S2.** Rate coefficients for the  $\text{CH}_2\text{OO} + \text{I}$  reaction ( $k_3$ ) as a function of the total pressure. The  $k_3$  can be obtained by fitting the measured time traces of  $\text{CH}_2\text{OO}$  using the kinetic model (Table S1) with input of initial concentrations of  $\text{CH}_2\text{I}$ ,  $\text{I}$ , and  $\text{O}_2$ , in which the rate coefficients at values listed in Table S1, except the  $k_3$ , were fixed while fitting the time traces. The blue curve derived by fitting the determined  $k_3$  in this work with the Lindemann's equation,  $k_3 = \{k_{3,0} [\text{M}] \times k_{3,\infty}\} / \{k_{3,0} [\text{M}] + k_{3,\infty}\}$ . The rate coefficients in the low and high pressure limits,  $k_{3,0}$  and  $k_{3,\infty}$ , are determined to be  $(1.47 \pm 0.37) \times 10^{-28} \text{ cm}^6 \text{ molecule}^{-1} \text{ s}^{-1}$  and  $(4.2 \pm 0.4) \times 10^{-11} \text{ cm}^3 \text{ molecule}^{-1} \text{ s}^{-1}$ , respectively. The data points shown by the green triangle are reported by Mir *et al.*<sup>3</sup>

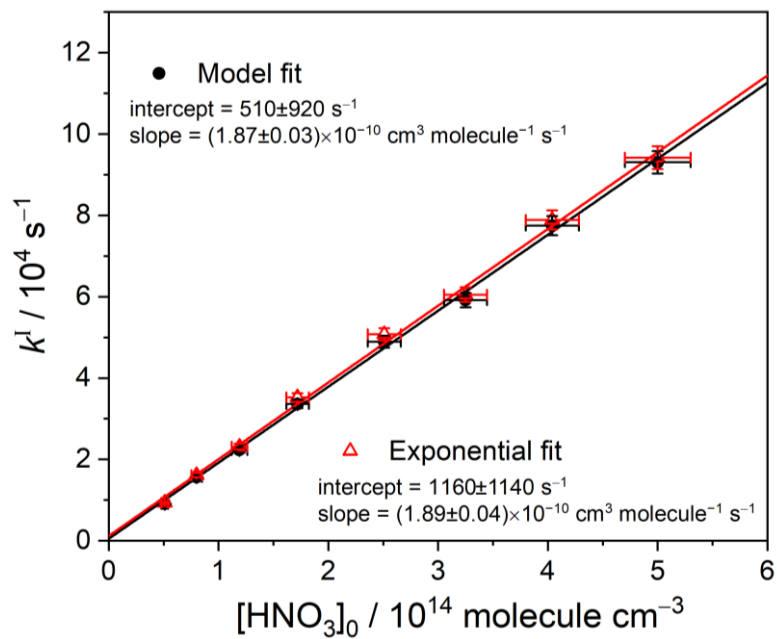

**Figure S3.** Comparison of plots of  $k^1$  vs.  $[\text{HNO}_3]_0$  derived from model fit and single-exponential fit. The data correspond to experimental set 1 listed in Table S2.

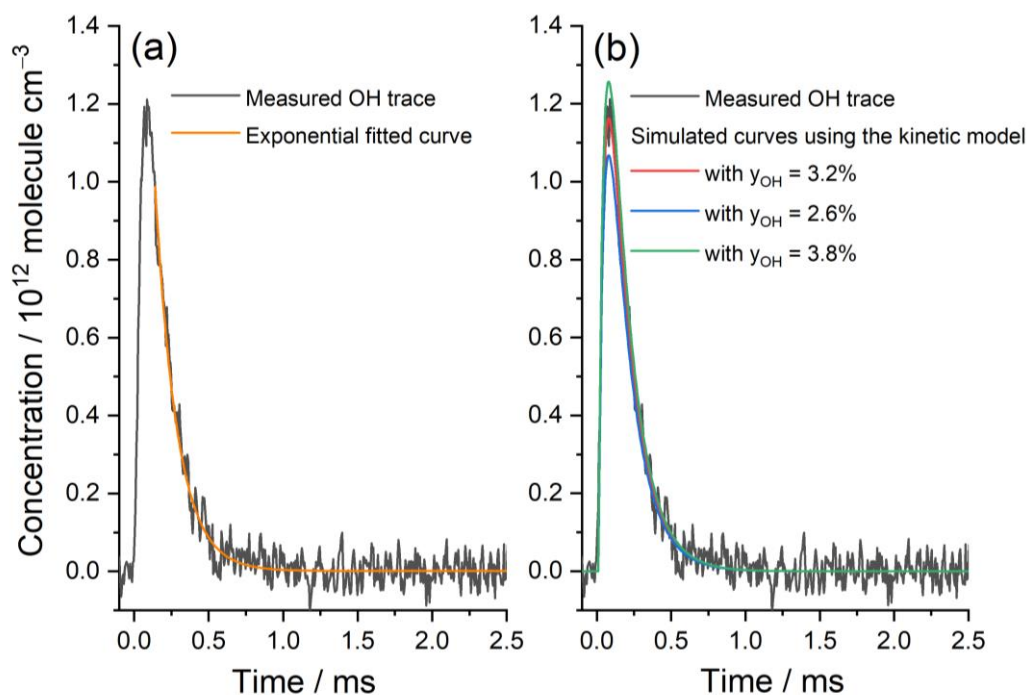

**Figure S4.** Comparison of the measured and simulated temporal profiles of the OH radical. (a) An overall decay rate ( $k_{18}$ ) of  $6800 \text{ s}^{-1}$  was obtained by fitting the time trace with a single exponential-decay function. (b) A comparison of the measured and simulated temporal profiles with the fixed  $k_{18}$  of  $6800 \text{ s}^{-1}$  and the  $y_{\text{OH}} = 3.2\%$ ,  $2.6\%$ , and  $3.8\%$ . Here, the data correspond to the experiment 3 listed in Table S5.

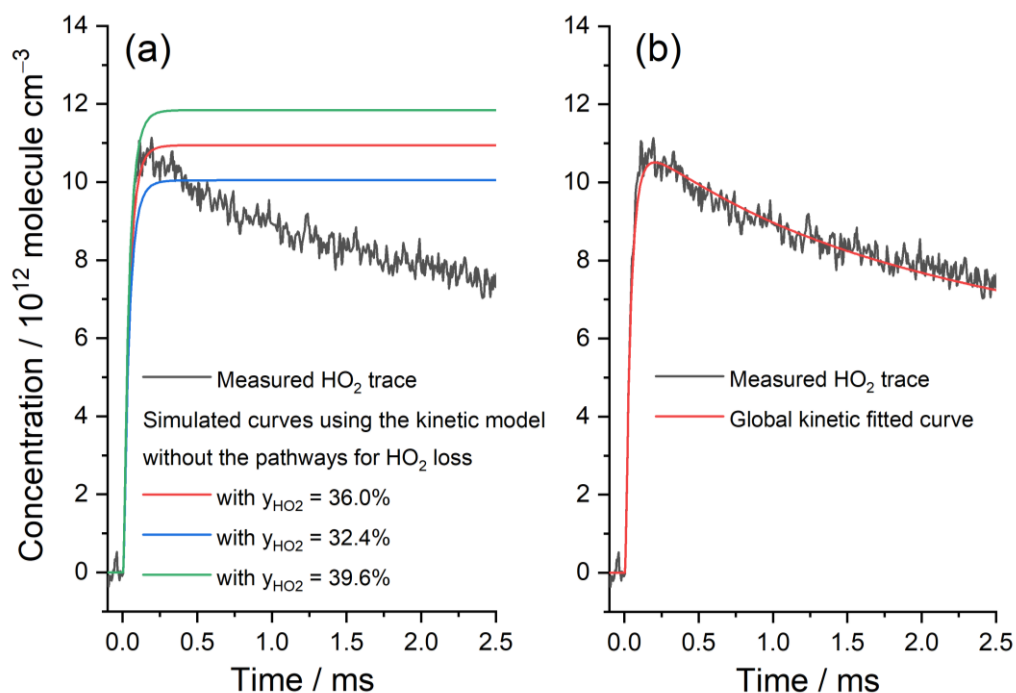

**Figure S5.** Comparison of the measured and simulated temporal profiles of the HO<sub>2</sub> radical. (a) A comparison of the measured and simulated temporal profiles excluding the loss pathways of HO<sub>2</sub> ( $R_{19}$ - $R_{21}$ ) and setting the  $y_{\text{HO}_2} = 36.0\%$ ,  $32.4\%$ , and  $39.6\%$ . (b) A comparison of the measured and fitted curve with global kinetic model listed in Table S4 with the fixed  $y_{\text{HO}_2} = 36.0\%$ . Here, the data correspond to the experiment 3 listed in Table S5.



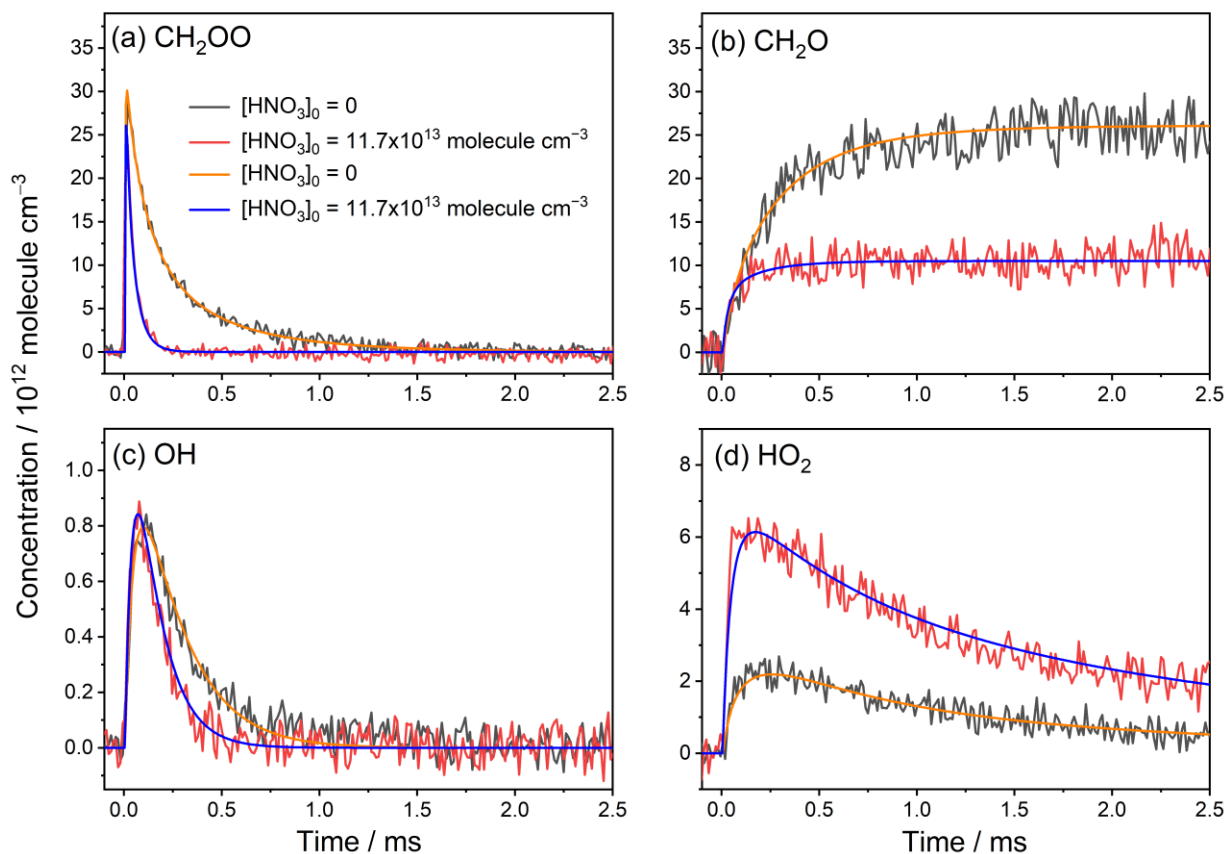

**Figure S6.** Comparison of temporal concentration profiles of (a)  $\text{CH}_2\text{OO}$ , (b)  $\text{CH}_2\text{O}$ , (c)  $\text{OH}$ , and (d)  $\text{HO}_2$  with and without  $\text{HNO}_3$  addition at 57.9 Torr. The temporal resolution of the measured temporal profiles (black and red) is 12  $\mu\text{s}$ . The orange and blue curves represent the simulation profiles using the kinetic model shown in Table S4. Here, the data correspond to the experiments 4 and 5 listed in Table S5.

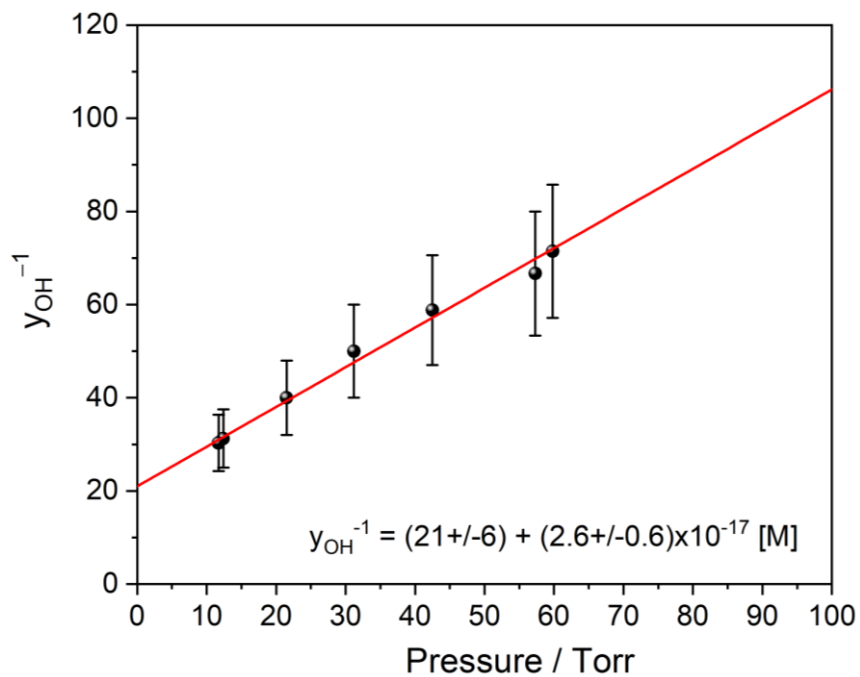

**Figure S7.** Inverse of the fractional yield of the OH + CH<sub>2</sub>(O)NO<sub>3</sub> product channel ( $y_{\text{OH}}^{-1}$ ) as a function of pressure. The red line indicates a linear fitting curve with an intercept of  $(21 \pm 6)$  and a slope of  $(2.6 \pm 0.6) \times 10^{-17} \text{ cm}^3 \text{ molecule}^{-1}$ .

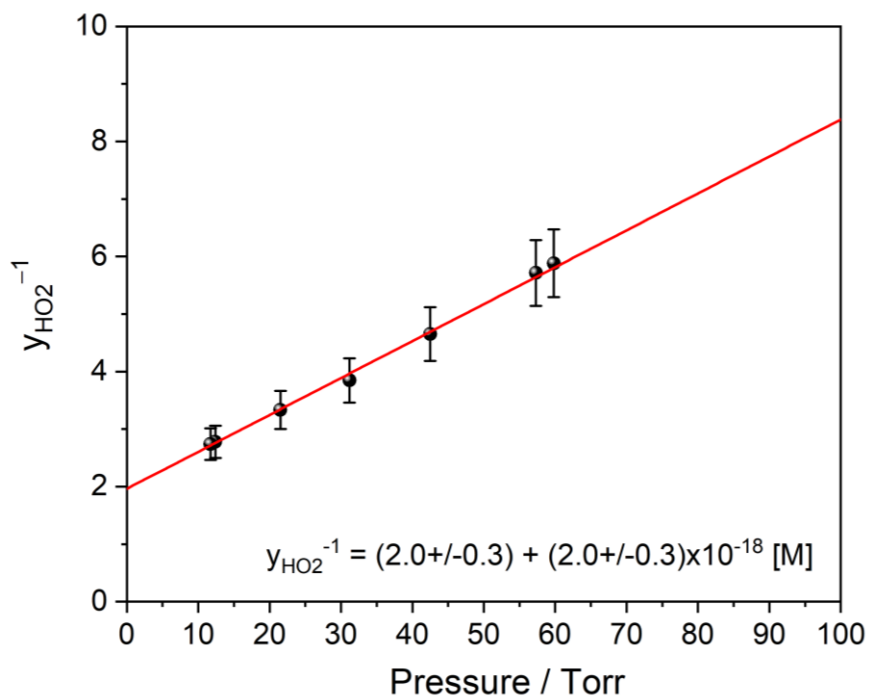

**Figure S8.** Inverse of the fractional yield of the  $\text{NO}_2 + \text{CH}_2\text{O} + \text{HO}_2$  product channel ( $y_{\text{HO}_2}^{-1}$ ) as a function of pressure. The red line indicates a linear fitting curve with an intercept of  $(2.0 \pm 0.3)$  and a slope of  $(2.0 \pm 0.3) \times 10^{-18} \text{ cm}^3 \text{ molecule}^{-1}$ .

**Table S1.** The simplified model used for the kinetic study of the reaction  $\text{CH}_2\text{OO} + \text{HNO}_3$ .

|            | Reaction                                                                                       | Rate coefficient <sup>a</sup>                                                                                                  | Ref.      |
|------------|------------------------------------------------------------------------------------------------|--------------------------------------------------------------------------------------------------------------------------------|-----------|
| $R_{1a}^b$ | $\text{CH}_2\text{I} + \text{O}_2 \rightarrow \text{CH}_2\text{OO} + \text{I}$                 | $\{1 - 0.4/(1+1\times 10^{-18} [\text{M}])\} \times 1.7\times 10^{-12} / (1+1\times 10^{-19} [\text{M}])$                      | 1,2       |
| $R_{1b}^b$ | $\text{CH}_2\text{I} + \text{O}_2 \xrightarrow{+M} \text{ICH}_2\text{OO}$                      | $1.7\times 10^{-12} - 1.7\times 10^{-12} / (1+1\times 10^{-19} [\text{M}])$                                                    | 1,2       |
| $R_{1c}^b$ | $\text{CH}_2\text{I} + \text{O}_2 \rightarrow \text{products}$                                 | $1.7\times 10^{-12} - (k_{1a} + k_{1b})$                                                                                       | 1,2       |
| $R_2$      | $\text{CH}_2\text{OO} + \text{CH}_2\text{OO} \rightarrow 2\text{CH}_2\text{O} + \text{O}_2$    | $8.0\times 10^{-11}$                                                                                                           | 3         |
| $R_3$      | $\text{CH}_2\text{OO} + \text{I} \xrightarrow{+M} \text{product}$                              | $k_3 = \{1.47\times 10^{-28} [\text{M}] \times 4.2\times 10^{-11}\} / \{1.47\times 10^{-28} [\text{M}] + 4.2\times 10^{-11}\}$ | This work |
| $R_4$      | $\text{ICH}_2\text{OO} + \text{ICH}_2\text{OO} \rightarrow 2\text{ICH}_2\text{O} + \text{O}_2$ | $9.0\times 10^{-11}$                                                                                                           | 4         |
| $R_5$      | $\text{ICH}_2\text{OO} + \text{I} \rightarrow \text{ICH}_2\text{O} + \text{IO}$                | $3.5\times 10^{-11}$                                                                                                           | 4         |
| $R_6$      | $\text{IO} + \text{IO} \rightarrow \text{products}$                                            | $9.9\times 10^{-11}$                                                                                                           | 5         |
| $R_7$      | $\text{CH}_2\text{OO} + \text{HNO}_3 \rightarrow \text{products}$                              | $k^I = k_7 \times [\text{HNO}_3]_0$ , fitted <sup>c</sup>                                                                      | This work |

<sup>a</sup> Rate coefficient in  $\text{cm}^3 \text{ molecule}^{-1} \text{ s}^{-1}$ ,  $[\text{M}]$  in  $\text{molecule cm}^{-3}$ .

<sup>b</sup>  $k_{1a} + k_{1b} + k_{1c} = 1.7\times 10^{-12} \text{ cm}^3 \text{ molecule}^{-1} \text{ s}^{-1}$ .

<sup>c</sup>  $k_7$  represents the rate coefficients for the reaction  $\text{CH}_2\text{OO} + \text{HNO}_3$ ,  $k_{\text{CH}_2\text{OO}+\text{HNO}_3}$ .

**Table S2** Summary of experimental conditions and fitted rate coefficients  $k^I$ .

| Set            | Expt. | $[\text{CH}_2\text{I}]_0$<br>/ $10^{12} c$ | $[\text{CH}_2\text{OO}]_0$<br>/ $10^{12} c$ | $[\text{O}_2]$<br>/ $10^{17} c$ | $P_T$<br>/Torr | $[\text{HNO}_3]_0^d$<br>/ $10^{14} c$ | $k^I e$<br>/ $10^4 \text{ s}^{-1}$ |
|----------------|-------|--------------------------------------------|---------------------------------------------|---------------------------------|----------------|---------------------------------------|------------------------------------|
| 1 <sup>a</sup> | 1     | 7.0                                        | 4.8                                         | 4.1                             | 13.7           | 5.00                                  | 9.31                               |
|                | 2     | 7.0                                        | 4.8                                         | 4.1                             | 13.7           | 4.04                                  | 7.75                               |
|                | 3     | 7.0                                        | 4.8                                         | 4.1                             | 13.7           | 3.25                                  | 5.92                               |
|                | 4     | 7.0                                        | 4.8                                         | 4.1                             | 13.7           | 2.51                                  | 4.89                               |
|                | 5     | 7.0                                        | 4.8                                         | 4.1                             | 13.7           | 1.72                                  | 3.36                               |
|                | 6     | 7.0                                        | 4.8                                         | 4.1                             | 13.7           | 1.19                                  | 2.23                               |
|                | 7     | 7.0                                        | 4.8                                         | 4.1                             | 13.7           | 0.80                                  | 1.57                               |
|                | 8     | 7.0                                        | 4.8                                         | 4.1                             | 13.7           | 0.51                                  | 0.91                               |
| 2 <sup>a</sup> | 9     | 4.5                                        | 3.0                                         | 2.6                             | 8.7            | 3.27                                  | 6.48                               |
|                | 10    | 4.5                                        | 3.0                                         | 2.6                             | 8.7            | 2.77                                  | 5.65                               |
|                | 11    | 4.5                                        | 3.0                                         | 2.6                             | 8.7            | 2.20                                  | 4.11                               |
|                | 12    | 4.5                                        | 3.0                                         | 2.6                             | 8.7            | 1.66                                  | 3.27                               |
|                | 13    | 4.5                                        | 3.0                                         | 2.6                             | 8.7            | 1.27                                  | 2.48                               |
|                | 14    | 4.5                                        | 3.0                                         | 2.6                             | 8.7            | 0.77                                  | 1.58                               |
|                | 15    | 4.5                                        | 3.0                                         | 2.6                             | 8.7            | 0.49                                  | 0.94                               |
| 3 <sup>a</sup> | 16    | 7.1                                        | 4.8                                         | 3.4                             | 12.2           | 3.73                                  | 7.16                               |
|                | 17    | 7.1                                        | 4.8                                         | 3.4                             | 12.2           | 4.10                                  | 7.61                               |
|                | 18    | 7.1                                        | 4.8                                         | 3.4                             | 12.2           | 2.50                                  | 4.65                               |
|                | 19    | 7.1                                        | 4.8                                         | 3.4                             | 12.2           | 2.11                                  | 4.21                               |
|                | 20    | 7.1                                        | 4.8                                         | 3.4                             | 12.2           | 1.41                                  | 2.57                               |
|                | 21    | 7.1                                        | 4.8                                         | 3.4                             | 12.2           | 0.86                                  | 1.61                               |
| 4 <sup>a</sup> | 22    | 8.9                                        | 6.3                                         | 3.6                             | 19.9           | 2.61                                  | 5.03                               |
|                | 23    | 8.9                                        | 6.3                                         | 3.6                             | 19.9           | 2.15                                  | 4.00                               |
|                | 24    | 8.9                                        | 6.3                                         | 3.6                             | 19.9           | 1.63                                  | 3.04                               |
|                | 25    | 8.9                                        | 6.3                                         | 3.6                             | 19.9           | 1.11                                  | 2.30                               |
|                | 26    | 8.9                                        | 6.3                                         | 3.6                             | 19.9           | 0.58                                  | 1.20                               |
| 5 <sup>a</sup> | 27    | 9.6                                        | 6.9                                         | 3.1                             | 27.4           | 3.18                                  | 6.50                               |
|                | 28    | 9.6                                        | 6.9                                         | 3.1                             | 27.4           | 2.62                                  | 5.22                               |
|                | 29    | 9.6                                        | 6.9                                         | 3.1                             | 27.4           | 2.14                                  | 3.99                               |
|                | 30    | 9.6                                        | 6.9                                         | 3.1                             | 27.4           | 1.76                                  | 3.28                               |
|                | 31    | 9.6                                        | 6.9                                         | 3.1                             | 27.4           | 1.34                                  | 2.62                               |
|                | 32    | 9.6                                        | 6.9                                         | 3.1                             | 27.4           | 0.92                                  | 1.85                               |
| 6 <sup>a</sup> | 33    | 11.2                                       | 8.2                                         | 3.4                             | 36.9           | 3.24                                  | 6.48                               |
|                | 34    | 11.2                                       | 8.2                                         | 3.4                             | 36.9           | 2.65                                  | 5.18                               |
|                | 35    | 11.2                                       | 8.2                                         | 3.4                             | 36.9           | 2.20                                  | 4.34                               |

|                 |    |      |     |     |      |      |      |
|-----------------|----|------|-----|-----|------|------|------|
|                 | 36 | 11.2 | 8.2 | 3.4 | 36.9 | 1.77 | 3.56 |
|                 | 37 | 11.2 | 8.2 | 3.4 | 36.9 | 1.34 | 2.90 |
| 7 <sup>a</sup>  | 38 | 6.5  | 4.6 | 3.6 | 58.6 | 3.32 | 6.29 |
|                 | 39 | 6.5  | 4.6 | 3.6 | 58.6 | 2.53 | 4.91 |
|                 | 40 | 6.5  | 4.6 | 3.6 | 58.6 | 1.75 | 3.27 |
|                 | 41 | 6.5  | 4.6 | 3.6 | 58.6 | 1.16 | 2.26 |
| 8 <sup>a</sup>  | 42 | 7.1  | 5.0 | 3.5 | 45.2 | 3.43 | 6.33 |
|                 | 43 | 7.1  | 5.0 | 3.5 | 45.2 | 2.49 | 4.73 |
|                 | 44 | 7.1  | 5.0 | 3.5 | 45.2 | 1.85 | 3.48 |
|                 | 45 | 7.1  | 5.0 | 3.5 | 45.2 | 1.33 | 2.75 |
|                 | 46 | 7.1  | 5.0 | 3.5 | 45.2 | 0.97 | 1.90 |
| 9 <sup>a</sup>  | 47 | 6.8  | 4.5 | 2.6 | 9.2  | 2.00 | 3.96 |
|                 | 48 | 6.8  | 4.5 | 2.6 | 9.2  | 2.70 | 5.28 |
|                 | 49 | 6.8  | 4.5 | 2.6 | 9.2  | 2.30 | 4.39 |
|                 | 50 | 6.8  | 4.5 | 2.6 | 9.2  | 1.57 | 2.95 |
|                 | 51 | 6.8  | 4.5 | 2.6 | 9.2  | 0.59 | 1.19 |
| 10 <sup>b</sup> | 52 | 6.8  | 4.5 | 2.6 | 9.2  | 2.03 | 4.07 |
|                 | 53 | 6.8  | 4.5 | 2.6 | 9.2  | 2.51 | 4.61 |
|                 | 54 | 6.8  | 4.5 | 2.6 | 9.2  | 0.83 | 1.59 |
|                 | 55 | 6.8  | 4.5 | 2.6 | 9.2  | 1.21 | 2.26 |
| 11 <sup>b</sup> | 56 | 10.8 | 7.1 | 1.6 | 6.3  | 2.32 | 4.32 |
|                 | 57 | 10.8 | 7.1 | 1.6 | 6.3  | 3.42 | 6.51 |
|                 | 58 | 10.8 | 7.1 | 1.6 | 6.3  | 4.49 | 8.62 |
|                 | 59 | 10.8 | 7.1 | 1.6 | 6.3  | 1.37 | 2.49 |
|                 | 60 | 10.8 | 7.1 | 1.6 | 6.3  | 0.92 | 1.71 |
|                 | 61 | 10.8 | 7.1 | 1.6 | 6.3  | 4.27 | 8.14 |
|                 | 62 | 10.8 | 7.1 | 1.6 | 6.3  | 2.96 | 5.50 |

<sup>a</sup> For the experiments, the CH<sub>2</sub>OO line at 1271.795 cm<sup>-1</sup> was probed.

<sup>b</sup> For the experiments, the CH<sub>2</sub>OO line at 1237.622 cm<sup>-1</sup> was probed.

<sup>c</sup> in unit of molecule cm<sup>-3</sup>.

<sup>d</sup> The mixing ratio of the gaseous HNO<sub>3</sub> in the bath gas O<sub>2</sub>/N<sub>2</sub> before injection into the reactor was determined using UV absorption spectra and the absorption cross section of HNO<sub>3</sub> in region 200–210 nm.<sup>6</sup> The [HNO<sub>3</sub>]<sub>0</sub> in the reactor was estimated by the ratio of its flow rate to the total flow rate and the total pressure. Considering the errors of UV absorption cross section of HNO<sub>3</sub> at 200–210 nm (5 %), the flow rates (3 %), temperature (1 %), and pressure (1 %), an overall uncertainty of [HNO<sub>3</sub>]<sub>0</sub> was estimated the to be 6 %.

<sup>e</sup> The *k*<sup>l</sup> obtained by fitting of CH<sub>2</sub>OO traces with the kinetic model listed in Table S1.

**Table S3** Summary of experimental and computational results for the  $k_{\text{CH}_2\text{OO}+\text{HNO}_3}$ .

| Study                                        | Temperature<br>/ T | Pressure<br>/ Torr | $[\text{CH}_2\text{OO}]_0$<br>/ $10^{13}$ <sup>a</sup> | $[\text{HNO}_3]_0$<br>/ $10^{13}$ <sup>a</sup> | $k_{\text{CH}_2\text{OO}+\text{HNO}_3}$<br>/ $10^{-10}$ <sup>b</sup> |
|----------------------------------------------|--------------------|--------------------|--------------------------------------------------------|------------------------------------------------|----------------------------------------------------------------------|
| This work                                    | 296                | 6.3–58.6           | 0.30–0.82                                              | 4.9–50.0                                       | $1.9 \pm 0.2$                                                        |
| Foreman <i>et al.</i> , 2016 <sup>7</sup>    | 295                | 27–35              | 1–2                                                    | 8–23                                           | $5.4 \pm 1.0$                                                        |
| Chung <i>et al.</i> , 2022 <sup>8</sup>      | 298                | 40–70              | >7                                                     | 150–590                                        | $2.4 \pm 0.4$                                                        |
| Yang <i>et al.</i> , 2022 <sup>9</sup>       | 298                | 7.7–399.0          | 0.03–0.14                                              | 0.8–24.2                                       | $1.51 \pm 0.45$                                                      |
| Raghunath <i>et al.</i> , 2017 <sup>10</sup> | 295                | 20–760             |                                                        |                                                | 5.1                                                                  |
| Vereecken, 2017 <sup>11</sup>                | 250–350            | 760                |                                                        |                                                | 2.5                                                                  |

<sup>a</sup> in unit of molecule  $\text{cm}^{-3}$ .<sup>b</sup> in  $\text{cm}^3 \text{ molecule}^{-1} \text{ s}^{-1}$ .

**Table S4.** Global kinetic model and rate coefficients employed for simulation of temporal profiles.

|               | Reaction                                                                                             | Rate coefficient <sup>a</sup>                                                                                    | Ref.     |
|---------------|------------------------------------------------------------------------------------------------------|------------------------------------------------------------------------------------------------------------------|----------|
| $R_{1a}^c$    | $\text{CH}_2\text{I} + \text{O}_2 \rightarrow \text{CH}_2\text{OO} + \text{I}$                       | $\{1 - 0.4/(1 + 1 \times 10^{-18} [\text{M}])\} \times 1.7 \times 10^{-12} / (1 + 1 \times 10^{-19} [\text{M}])$ | 1,2      |
| $R_{1b}^c$    | $\text{CH}_2\text{I} + \text{O}_2 \xrightarrow{+M} \text{ICH}_2\text{OO}$                            | $1.7 \times 10^{-12} - 1.7 \times 10^{-12} / (1 + 1 \times 10^{-19} [\text{M}])$                                 | 1,2      |
| $R_{1cI}^c$   | $\text{CH}_2\text{I} + \text{O}_2 \rightarrow \text{CH}_2\text{OO}^\# + \text{I}$                    | $1.2 \times 10^{-13}$                                                                                            | 2        |
| $R_{1cII}^c$  | $\text{CH}_2\text{I} + \text{O}_2 \rightarrow \text{OH}^\# + \text{HCO}^\# + \text{I}$               | $k_{1cII}$                                                                                                       | <i>d</i> |
| $R_{1cIII}^c$ | $\text{CH}_2\text{I} + \text{O}_2 \rightarrow 2\text{H} + \text{CO}_2 + \text{I}$                    | $k_{1cIII}$                                                                                                      | <i>d</i> |
| $R_{1cIV}^c$  | $\text{CH}_2\text{I} + \text{O}_2 \rightarrow \text{products} + \text{I}$                            | $1.7 \times 10^{-12} - (k_{1a} + k_{1b} + k_{1cI} + k_{1cII} + k_{1cIII})$                                       | <i>d</i> |
| $R_2$         | $\text{CH}_2\text{OO} + \text{CH}_2\text{OO} \rightarrow 2\text{CH}_2\text{O} + \text{O}_2$          | $8.0 \times 10^{-11}$                                                                                            | 3        |
| $R_{3a}$      | $\text{CH}_2\text{OO} + \text{I} \xrightarrow{+M} \text{CH}_2\text{O}^\# + \text{IO}$                | $0.56 \times k_3$                                                                                                | <i>d</i> |
| $R_{3b}$      | $\text{CH}_2\text{OO} + \text{I} \xrightarrow{+M} \text{ICH}_2\text{OO}$                             | $0.44 \times k_3$                                                                                                | <i>d</i> |
| $R_4$         | $\text{ICH}_2\text{OO} + \text{ICH}_2\text{OO} \rightarrow 2\text{ICH}_2\text{O} + \text{O}_2$       | $9.0 \times 10^{-11}$                                                                                            | 4        |
| $R_5$         | $\text{ICH}_2\text{OO} + \text{I} \rightarrow \text{ICH}_2\text{O} + \text{IO}$                      | $3.5 \times 10^{-11}$                                                                                            | 4        |
| $R_6$         | $\text{IO} + \text{IO} \rightarrow \text{products}$                                                  | $9.9 \times 10^{-11}$                                                                                            | 5        |
| $R_{7a}$      | $\text{CH}_2\text{OO} + \text{HNO}_3 \rightarrow \text{OH} + \text{CH}_2(\text{O})\text{NO}_3$       | $y_{\text{OH}} \times k_7$                                                                                       | <i>d</i> |
| $R_{7b}$      | $\text{CH}_2\text{OO} + \text{HNO}_3 \rightarrow \text{NO}_2 + \text{CH}_2\text{O} + \text{HO}_2$    | $y_{\text{HO}_2} \times k_7$                                                                                     | <i>d</i> |
| $R_{7c}$      | $\text{CH}_2\text{OO} + \text{HNO}_3 \rightarrow \text{other products}$                              | $(1 - y_{\text{OH}} - y_{\text{HO}_2}) \times k_7$                                                               | <i>d</i> |
| $R_8$         | $\text{CH}_2\text{OO} + \text{CH}_2\text{OO}^\# \rightarrow 2\text{CH}_2\text{O}^\# + \text{O}_2$    | $8.0 \times 10^{-11}$                                                                                            | 2        |
| $R_9$         | $\text{CH}_2\text{OO}^\# + \text{CH}_2\text{OO}^\# \rightarrow 2\text{CH}_2\text{O}^\# + \text{O}_2$ | $8.0 \times 10^{-11}$                                                                                            | 2        |
| $R_{10a}$     | $\text{CH}_2\text{OO}^\# + \text{I} \xrightarrow{+M} \text{CH}_2\text{O}^\# + \text{IO}$             | set as same as $k_{3a}$                                                                                          | 2        |
| $R_{10b}$     | $\text{CH}_2\text{OO}^\# + \text{I} \xrightarrow{+M} \text{ICH}_2\text{OO}$                          | set as same as $k_{3b}$                                                                                          | 2        |
| $R_{11a}$     | $\text{CH}_2\text{OO}^\# + \text{HNO}_3 \rightarrow \text{OH} + \text{CH}_2(\text{O})\text{NO}_3$    | set as same as $k_{7a}$                                                                                          | <i>d</i> |
| $R_{11b}$     | $\text{CH}_2\text{OO}^\# + \text{HNO}_3 \rightarrow \text{NO}_2 + \text{CH}_2\text{O} + \text{HO}_2$ | set as same as $k_{7b}$                                                                                          | <i>d</i> |
| $R_{11c}$     | $\text{CH}_2\text{OO}^\# + \text{HNO}_3 \rightarrow \text{products}$                                 | set as same as $k_{7c}$                                                                                          | <i>d</i> |
| $R_{12a}$     | $\text{CH}_2\text{OO}^\# \rightarrow \text{OH} + \text{HCO}$                                         | $2000^b$                                                                                                         | 2        |



|           |                                                                           |                           |     |
|-----------|---------------------------------------------------------------------------|---------------------------|-----|
| $R_{12b}$ | $\text{CH}_2\text{OO}^\# \rightarrow 2\text{H} + \text{CO}_2$             | $500^b$                   | 2   |
| $R_{12c}$ | $\text{CH}_2\text{OO}^\# \rightarrow \text{products}$                     | $200^b$                   | 2   |
| $R_{13}$  | $\text{OH}^\# \xrightarrow{+M} \text{OH}$                                 | $2.5 \times 10^4{}^b$     | 12  |
| $R_{14}$  | $\text{HCO}^\# \xrightarrow{+M} \text{HCO}$                               | $3.0 \times 10^4{}^b$     | 13  |
| $R_{15}$  | $\text{CH}_2\text{O}^\# \xrightarrow{+M} \text{CH}_2\text{O}$             | $5000^b$                  | 2   |
| $R_{16}$  | $\text{H} + \text{O}_2 \xrightarrow{+M} \text{HO}_2$                      | $7.0 \times 10^{-14}$     | 14  |
| $R_{17}$  | $\text{HCO} + \text{O}_2 \rightarrow \text{HO}_2 + \text{CO}$             | $5.5 \times 10^{-12}$     | 15  |
| $R_{18}$  | $\text{OH} + \text{others} \rightarrow \text{products}$                   | $k_{18} \text{ fitted}^b$ | $d$ |
| $R_{19}$  | $\text{HO}_2 + \text{HO}_2 \rightarrow \text{H}_2\text{O}_2 + \text{O}_2$ | $1.7 \times 10^{-12}$     | 16  |
| $R_{20}$  | $\text{HO}_2 + \text{IO} \rightarrow \text{O}_2 + \text{HIO}$             | $8.4 \times 10^{-11}$     | 5   |
| $R_{21}$  | $\text{HO}_2 + \text{others} \rightarrow \text{products}$                 | $k_{21} \text{ fitted}^b$ | $d$ |

<sup>a</sup> Rate coefficient in  $\text{cm}^3 \text{ molecule}^{-1} \text{ s}^{-1}$ , unless specified, [M] in  $\text{molecule cm}^{-3}$ .

<sup>b</sup> Rate coefficient in  $\text{s}^{-1}$ .

<sup>c</sup>  $k_{1a} + k_{1b} + k_{1cI} + k_{1cII} + k_{1cIII} + k_{1cIV} = 1.7 \times 10^{-12} \text{ cm}^3 \text{ molecule}^{-1} \text{ s}^{-1}$ .

<sup>d</sup> The values obtained in this work.

**Table S5** Summary of experimental conditions, obtained rate coefficients, and branching ratios.

| Expt. | $[\text{CH}_2\text{I}]_0$<br>/ $10^{13}$ <sup>a</sup> | $[\text{HNO}_3]_0$<br>/ $10^{13}$ <sup>a</sup> | $[\text{O}_2]$<br>/ $10^{17}$ <sup>a</sup> | $P_T$<br>/Torr | $k_{1cII}$<br>/ $10^{-14}$ <sup>b</sup> | $k_{1cIII}$<br>/ $10^{-14}$ <sup>b</sup> | $k_{18}$<br>/ $10^3$ <sup>c</sup> | $k_{21}$<br>/ $10^2$ <sup>c</sup> | $y_{\text{OH}}$ <sup>d</sup> | $y_{\text{HO}_2}$ <sup>d</sup> |
|-------|-------------------------------------------------------|------------------------------------------------|--------------------------------------------|----------------|-----------------------------------------|------------------------------------------|-----------------------------------|-----------------------------------|------------------------------|--------------------------------|
| 1     | 3.8                                                   | 0.0                                            | 2.0                                        | 12.5           | 4.0                                     | 1.8                                      | 5.3                               | 2.6                               | –                            | –                              |
| 2     | 3.8                                                   | 7.2                                            | 2.0                                        | 12.5           | 4.0                                     | 1.8                                      | 6.8                               | 0.5                               | 0.032                        | 0.360                          |
| 3     | 3.8                                                   | 14.7                                           | 2.0                                        | 12.5           | 4.0                                     | 1.8                                      | 6.8                               | 0.5                               | 0.032                        | 0.360                          |
| 4     | 4.5                                                   | 0.0                                            | 2.3                                        | 57.9           | 3.0                                     | 1.4                                      | 6.2                               | 2.6                               | –                            | –                              |
| 5     | 4.5                                                   | 11.7                                           | 2.3                                        | 57.9           | 3.0                                     | 1.4                                      | 8.0                               | 2.5                               | 0.015                        | 0.175                          |
| 6     | 4.3                                                   | 0.0                                            | 1.8                                        | 21.5           | 3.8                                     | 1.7                                      | 5.4                               | 2.6                               | –                            | –                              |
| 7     | 4.3                                                   | 9.6                                            | 1.8                                        | 21.5           | 3.8                                     | 1.7                                      | 6.9                               | 1.0                               | 0.025                        | 0.300                          |
| 8     | 4.3                                                   | 0.0                                            | 2.0                                        | 31.2           | 3.5                                     | 1.6                                      | 5.6                               | 2.6                               | –                            | –                              |
| 9     | 4.3                                                   | 9.4                                            | 2.0                                        | 31.2           | 3.5                                     | 1.6                                      | 7.2                               | 1.6                               | 0.020                        | 0.260                          |
| 10    | 4.5                                                   | 0.0                                            | 2.1                                        | 42.5           | 3.3                                     | 1.5                                      | 5.8                               | 2.6                               | –                            | –                              |
| 12    | 4.5                                                   | 8.9                                            | 2.1                                        | 42.5           | 3.3                                     | 1.5                                      | 7.5                               | 2.2                               | 0.017                        | 0.215                          |
| 13    | 3.0                                                   | 0.0                                            | 1.9                                        | 11.7           | 4.0                                     | 1.8                                      | 5.3                               | 2.6                               | –                            | –                              |
| 14    | 3.0                                                   | 9.1                                            | 1.9                                        | 11.7           | 4.0                                     | 1.8                                      | 6.8                               | 0.5                               | 0.033                        | 0.365                          |
| 15    | 3.0                                                   | 5.4                                            | 1.9                                        | 11.7           | 4.0                                     | 1.8                                      | 6.8                               | 0.5                               | 0.033                        | 0.365                          |
| 16    | 3.0                                                   | 0.0                                            | 2.3                                        | 59.8           | 3.0                                     | 1.4                                      | 6.2                               | 2.6                               | –                            | –                              |
| 17    | 3.0                                                   | 6.5                                            | 2.3                                        | 59.8           | 3.0                                     | 1.4                                      | 8.0                               | 2.5                               | 0.014                        | 0.170                          |

<sup>a</sup> in unit of molecule  $\text{cm}^{-3}$ .

<sup>b</sup> in unit of  $\text{cm}^3 \text{ molecule}^{-1} \text{ s}^{-1}$ .

<sup>c</sup> in unit of  $\text{s}^{-1}$ .

<sup>d</sup> The  $y_{\text{OH}}$  and  $y_{\text{HO}_2}$  represent the branching ratios for the  $\text{OH} + \text{CH}_2(\text{O})\text{NO}_3$  and  $\text{NO}_2 + \text{CH}_2\text{O} + \text{HO}_2$  product channels, respectively, in the  $\text{CH}_2\text{OO} + \text{HNO}_3$  reaction.

## References

- (1) Ting, W.-L.; Chang, C.-H.; Lee, Y.-F.; Matsui, H.; Lee, Y.-P.; Lin, J. J.-M. Detailed mechanism of the  $\text{CH}_2\text{I} + \text{O}_2$  reaction: Yield and self-reaction of the simplest Criegee intermediate  $\text{CH}_2\text{OO}$ . *The Journal of Chemical Physics* **2014**, *141*, 104308.
- (2) Luo, P.-L.; Chen, I.-Y. Synchronized two-color time-resolved dual-comb spectroscopy for quantitative detection of  $\text{HO}_x$  radicals formed from Criegee intermediates. *Anal. Chem.* **2022**, *94*, 5752–5759.
- (3) Mir, Z. S.; Lewis, T. R.; Onel, L.; Blitz, M. A.; Seakins, P. W.; Stone, D.  $\text{CH}_2\text{OO}$  Criegee intermediate UV absorption cross-sections and kinetics of  $\text{CH}_2\text{OO} + \text{CH}_2\text{OO}$  and  $\text{CH}_2\text{OO} + \text{I}$  as a function of pressure. *Physical Chemistry Chemical Physics* **2020**, *22*, 9448–9459.
- (4) Gravestock, T. J.; Blitz, M. A.; Bloss, W. J.; Heard, D. E. A multidimensional study of the reaction  $\text{CH}_2\text{I} + \text{O}_2$ : Products and atmospheric implications. *ChemPhysChem* **2010**, *11*, 3928–3941.
- (5) Atkinson, R.; Baulch, D. L.; Cox, R. A.; Crowley, J. N.; Hampson, R. F.; Hynes, R. G.; Jenkin, M. E.; Rossi, M. J.; and Troe, J. Evaluated kinetic and photochemical data for atmospheric chemistry: Volume III – gas phase reactions of inorganic halogens. *Atmospheric Chemistry and Physics* **2007**, *7*, 981–1191.
- (6) Sander, S. P.; Friedl, R. R.; Abbatt, J. P. D.; Barker, J. R.; Burkholder, J. B.; Golden, D. M.; Kolb, C. E.; Kurylo, M. J.; Moortgat, G. K.; Wine, P. H.; Huie, R. E.; Orkin, V. L. *Chemical Kinetics and Photochemical Data for Use in Atmospheric Studies*; Evaluation Number 17, JPL Publication 10-6; Jet Propulsion Laboratory: Pasadena, CA, 2011.
- (7) Foreman, E. S.; Kapnas, K. M.; Murray, C. *Angew. Chem., Int. Ed.*, **2016**, *55*, 10419–10422.
- (8) Chung, C.-A.; Hsu, C.-W.; Lee, Y.-P. Infrared characterization of the products and rate coefficient of the reaction between Criegee Intermediate  $\text{CH}_2\text{OO}$  and  $\text{HNO}_3$ . *J. Phys. Chem. A* **2022**, *126*, 5738–5750.
- (9) Yang, J.-N.; Takahashi, K.; Lin, J.-M. Reaction kinetics of Criegee intermediates with nitric acid. *J. Phys. Chem. A* **2022**, *126*, 6160–6170.
- (10) Raghunath, P.; Lee, Y.-P.; Lin, M. C. Computational chemical kinetics for the reaction of Criegee intermediate  $\text{CH}_2\text{OO}$  with  $\text{HNO}_3$  and its catalytic conversion to OH and HCO. *J. Phys. Chem. A* **2017**, *121*, 3871–3878.
- (11) Vereecken, L. The reaction of Criegee intermediates with acids and enols. *Phys. Chem. Chem. Phys.* **2017**, *19*, 28630–28640.
- (12) D’Ottone, L.; Bauer, D.; Campuzano-Jost, P.; Fardy, M.; Hynes, A. J. Vibrational deactivation studies of  $\text{OH X } ^2\Pi$  ( $v = 1-5$ ) by  $\text{N}_2$  and  $\text{O}_2$ . *Physical Chemistry Chemical Physics* **2004**, *6*, 4276–4282.
- (13) Langford, A. O.; Moore, C. B. Reaction and relaxation of vibrationally excited formyl radicals. *The Journal of Chemical Physics* **1984**, *80*, 4204–4210.
- (14) Michael, J. V.; Su, M.-C.; Sutherland, J. W.; Carroll, J. J.; Wagner, A. F. Rate constants for  $\text{H} + \text{O}_2 + \text{M} \rightarrow \text{HO}_2 + \text{M}$  in seven bath gases. *The Journal of Physical Chemistry* **2002**, *106*, 5297–5313.
- (15) Atkinson, R.; Baulch, D. L.; Cox, R. A.; Hampson, R. F.; Kerr, J. A.; Rossi, M. J.; Troe, J. Evaluated kinetic, photochemical and heterogeneous data for atmospheric chemistry: Supplement V. IUPAC Subcommittee on Gas Kinetic Data Evaluation for Atmospheric Chemistry. *Journal of Physical and Chemical*

*Reference Data* **1997**, *26*, 521–1011.

(16) Atkinson, R.; Baulch, D. L.; Cox, R. A.; Crowley, J. N.; Hampson, R. F.; Hynes, R. G.; Jenkin, M. E.; Rossi, M. J.; and Troe, J. Evaluated kinetic and photochemical data for atmospheric chemistry: Volume I – gas phase reactions of O<sub>x</sub>, HO<sub>x</sub>, NO<sub>x</sub> and SO<sub>x</sub> species. *Atmospheric Chemistry and Physics* **2004**, *4*, 1461–1738.
